# Supplementary material for: Rapid one-pot synthesis of tapered star copolymers via ultra-fast coupling of polystyryllithium chain ends
Source: Royal Society of Chemistry journal article supplement (doi:10.1039/c8py01656a), 2019-01-01
Supplement: c8py01656a1.pdf [file c8py01656a1.pdf]

## Supplementary Information

### Rapid One-Pot Synthesis of Tapered Star Copolymers via Ultra-Fast Coupling of Polystyryllithium Chain Ends

Philipp von Tiedemann,<sup>a,b</sup> Kamil Maciol,<sup>a</sup> Jasmin Preis,<sup>c</sup> Paweł Sajkiewicz,<sup>d</sup> Holger Frey<sup>\*,a</sup>

<sup>a</sup> Institute of Organic Chemistry, Johannes Gutenberg University, Duesbergweg 10-14, 55128 Mainz (Germany)

<sup>b</sup> Graduate School Materials Science in Mainz, Staudinger Weg 9, 55128, Mainz (Germany)

<sup>c</sup> PSS Polymer Standards Service GmbH, In der Dallheimer Wiese 5, 55120 Mainz (Germany)

<sup>d</sup> Institute of Fundamental Technological Research, Polish Academy of Sciences, Adolfa Pawińskiego 5b, 02-106 Warsaw (Poland)

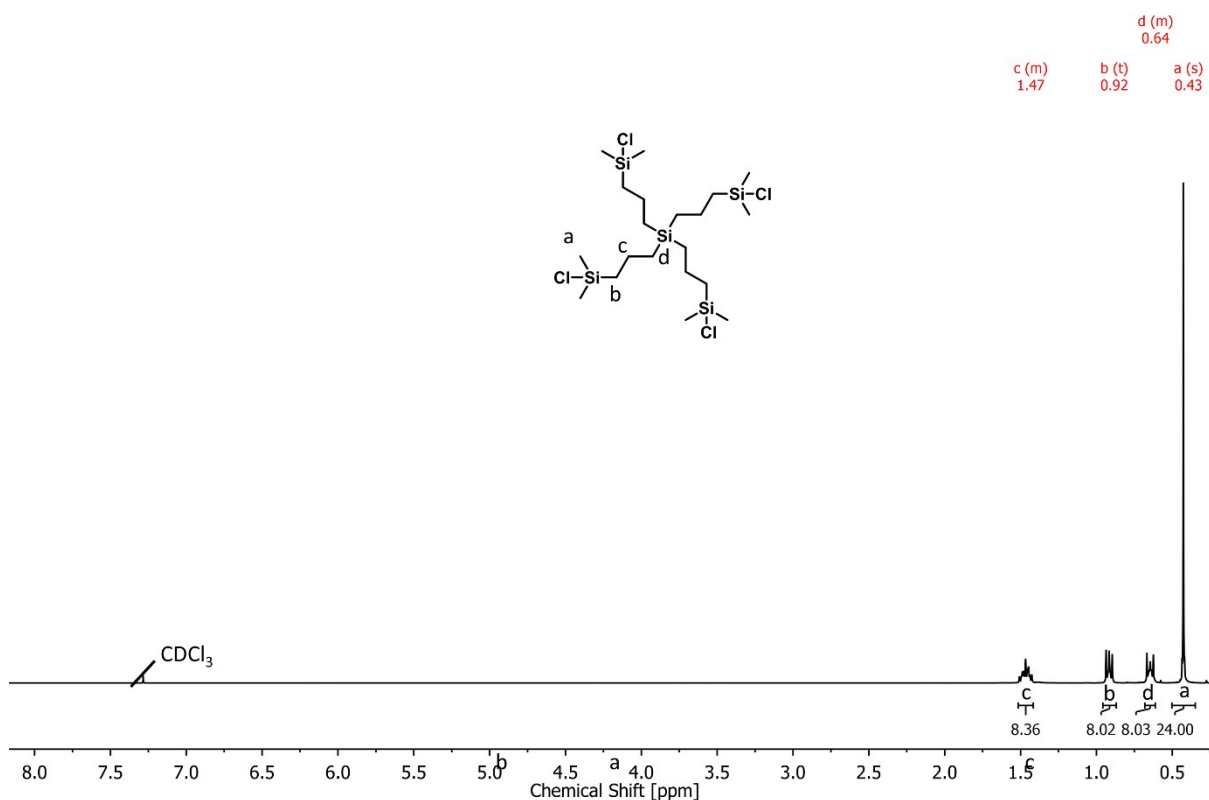

**Figure S1:** <sup>1</sup>H NMR spectrum of tetra[3-(chloro dimethylsilyl)propyl]silane (400 MHz, CDCl<sub>3</sub>).

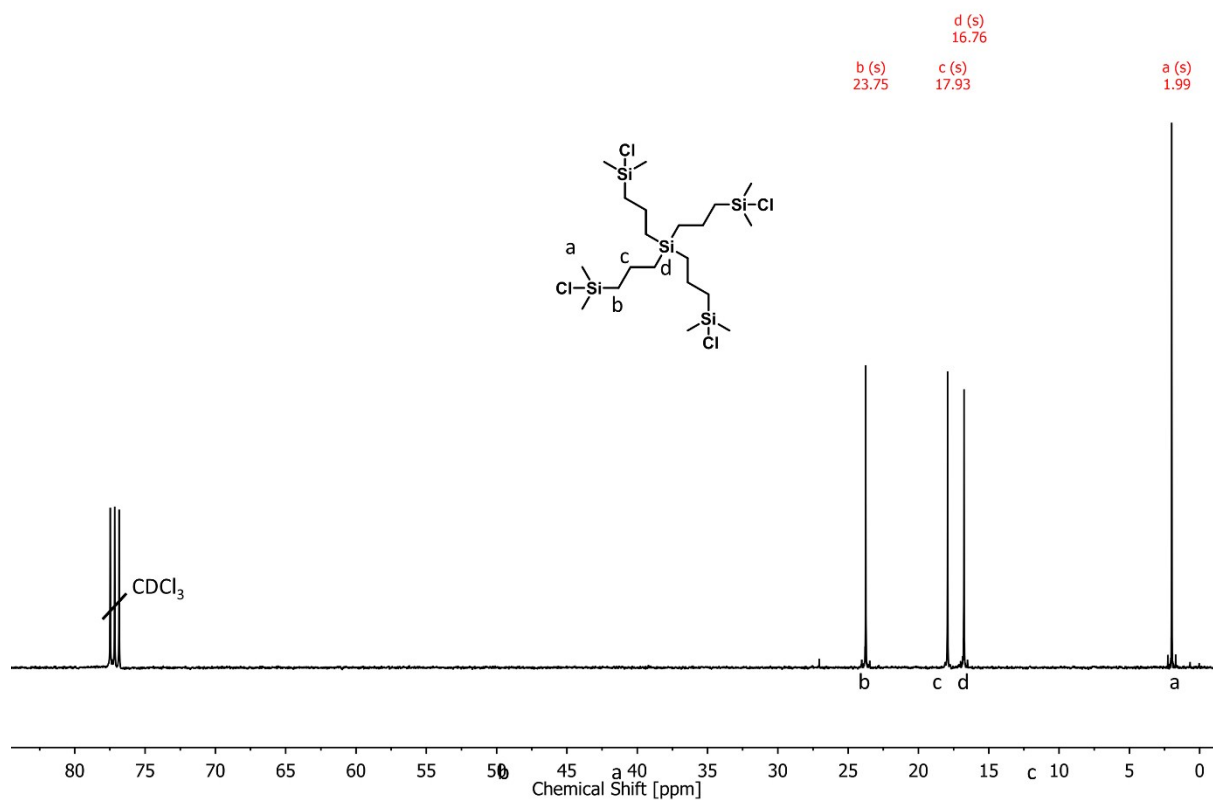

**Figure S2:** <sup>13</sup>C NMR spectrum of tetra[3-(chloro dimethylsilyl)propyl]silane (400 MHz, CDCl<sub>3</sub>).

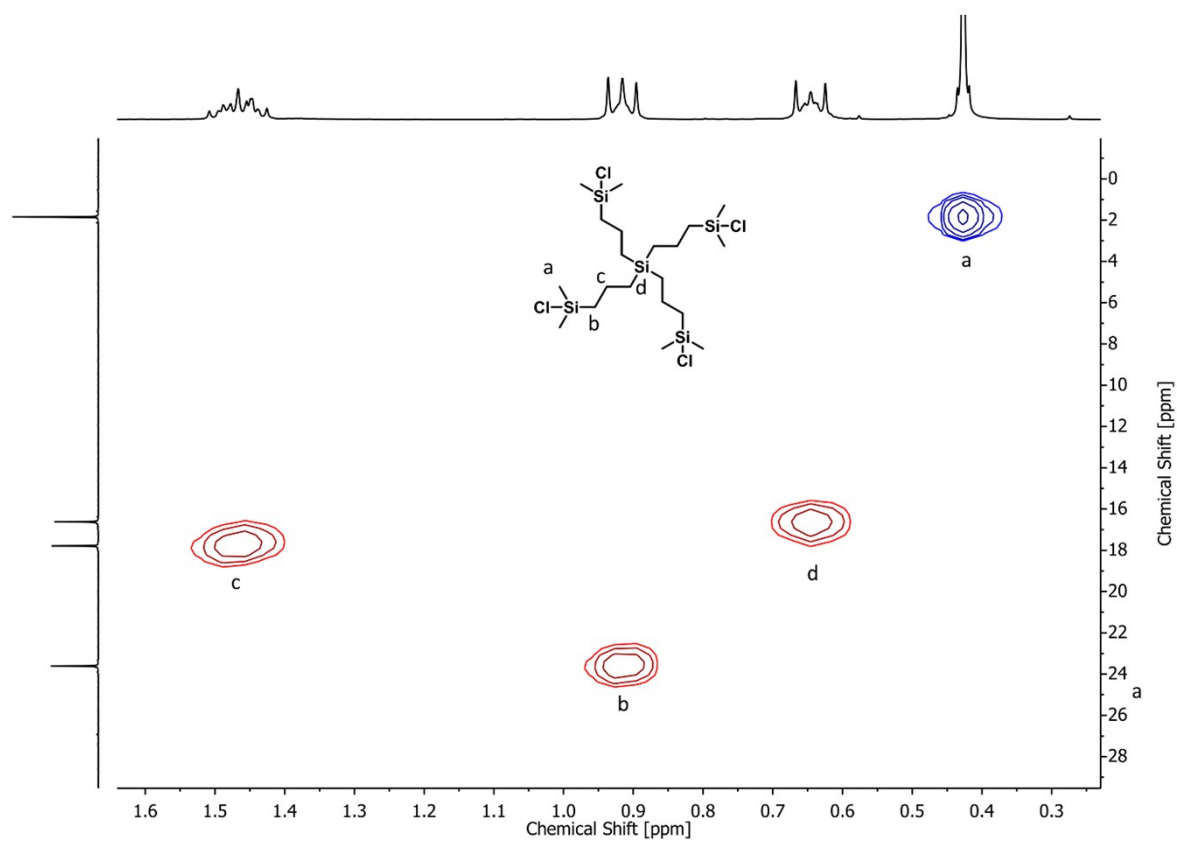

**Figure S3:** HSQC spectrum of tetra[3-(chloro dimethylsilyl)propyl]silane (400 MHz, CDCl<sub>3</sub>).

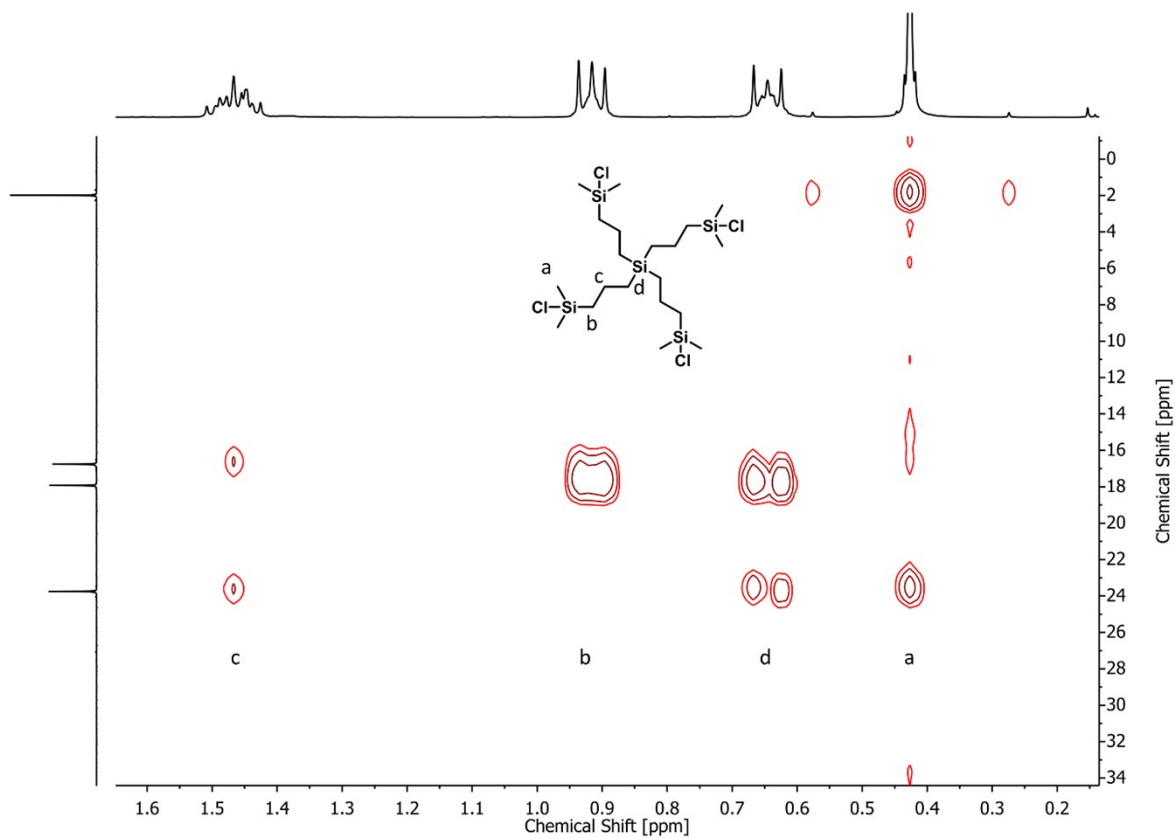

**Figure S4:** HMBC spectrum of tetra[3-(chloro dimethylsilyl)propyl]silane (400 MHz,  $CDCl_3$ ).

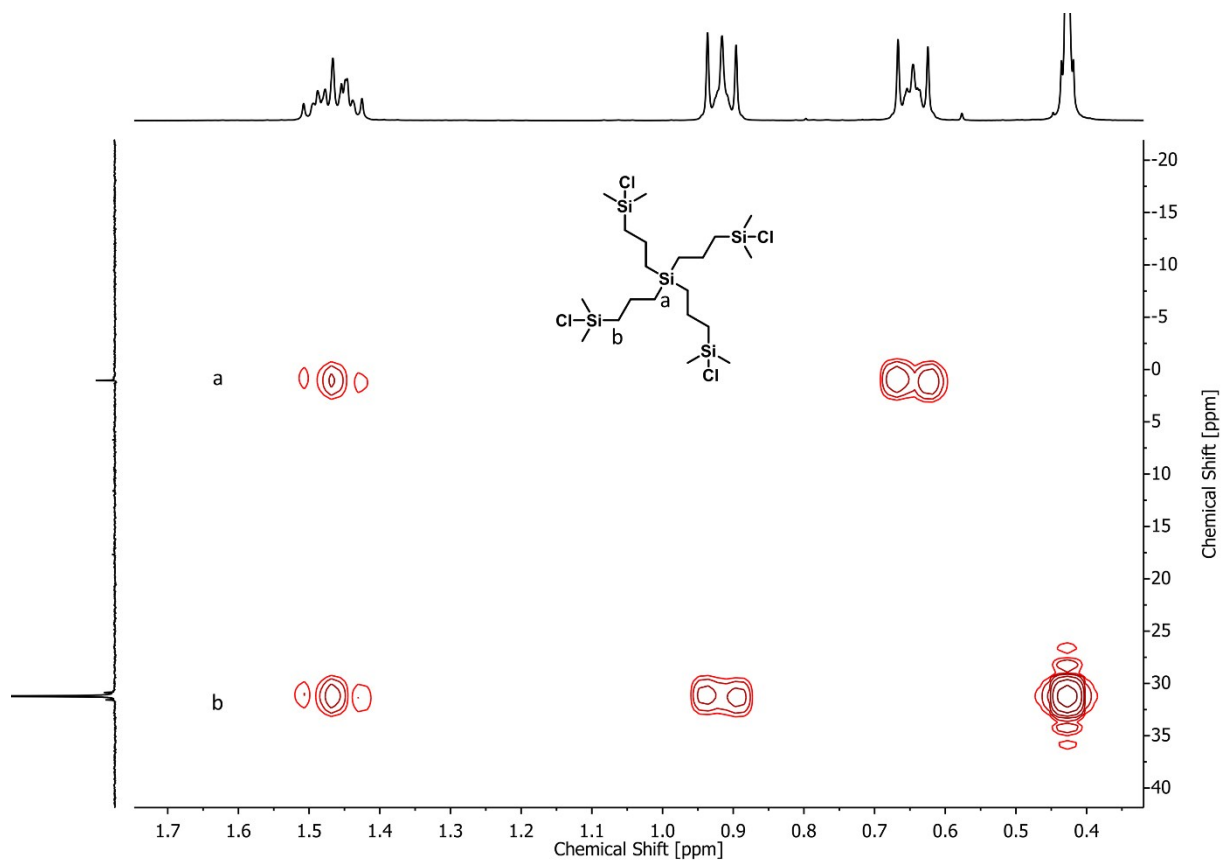

**Figure S5:**  $^{29}Si$  HMBC/DEPT spectrum of tetra[3-(chloro dimethylsilyl)propyl]silane (400 MHz,  $CDCl_3$ ).

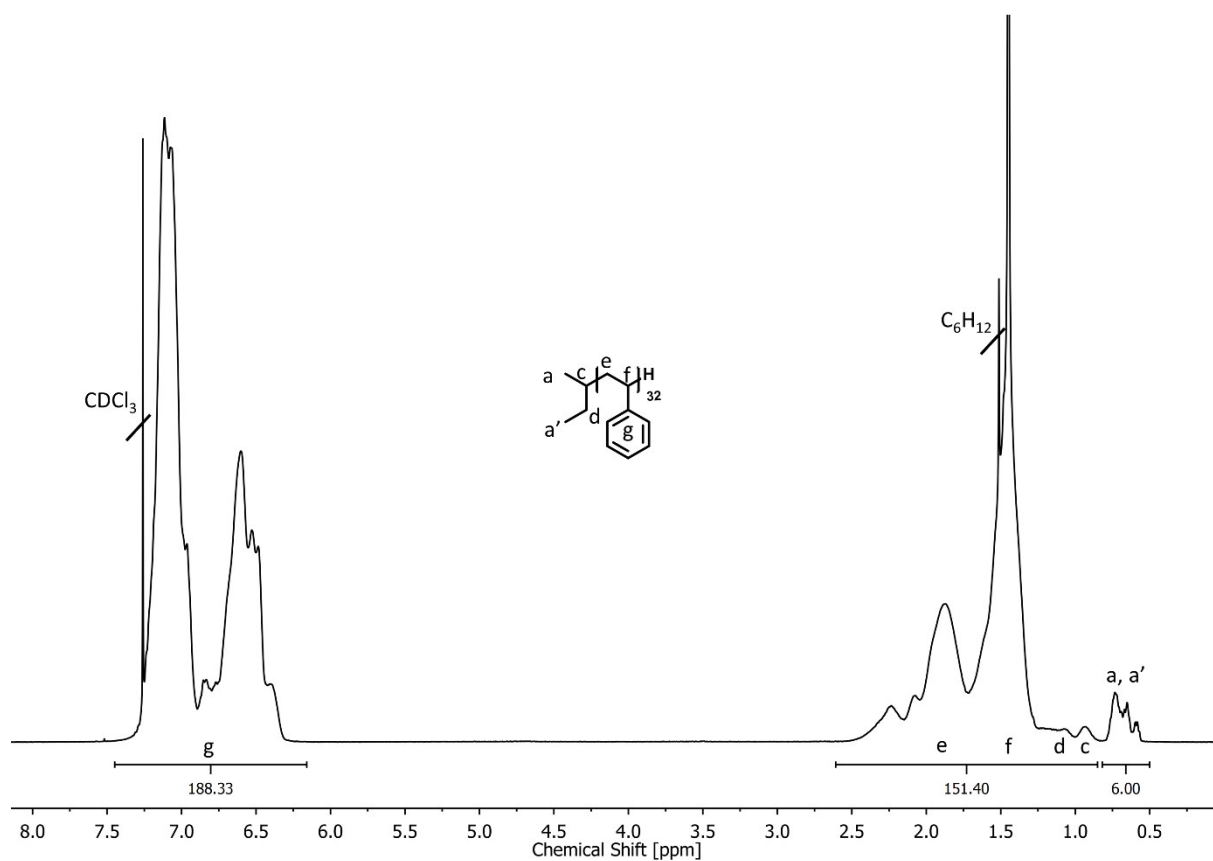

**Figure S6:**  $^1\text{H}$  NMR spectrum of polystyrene star precursor (400 MHz,  $\text{CDCl}_3$ ).

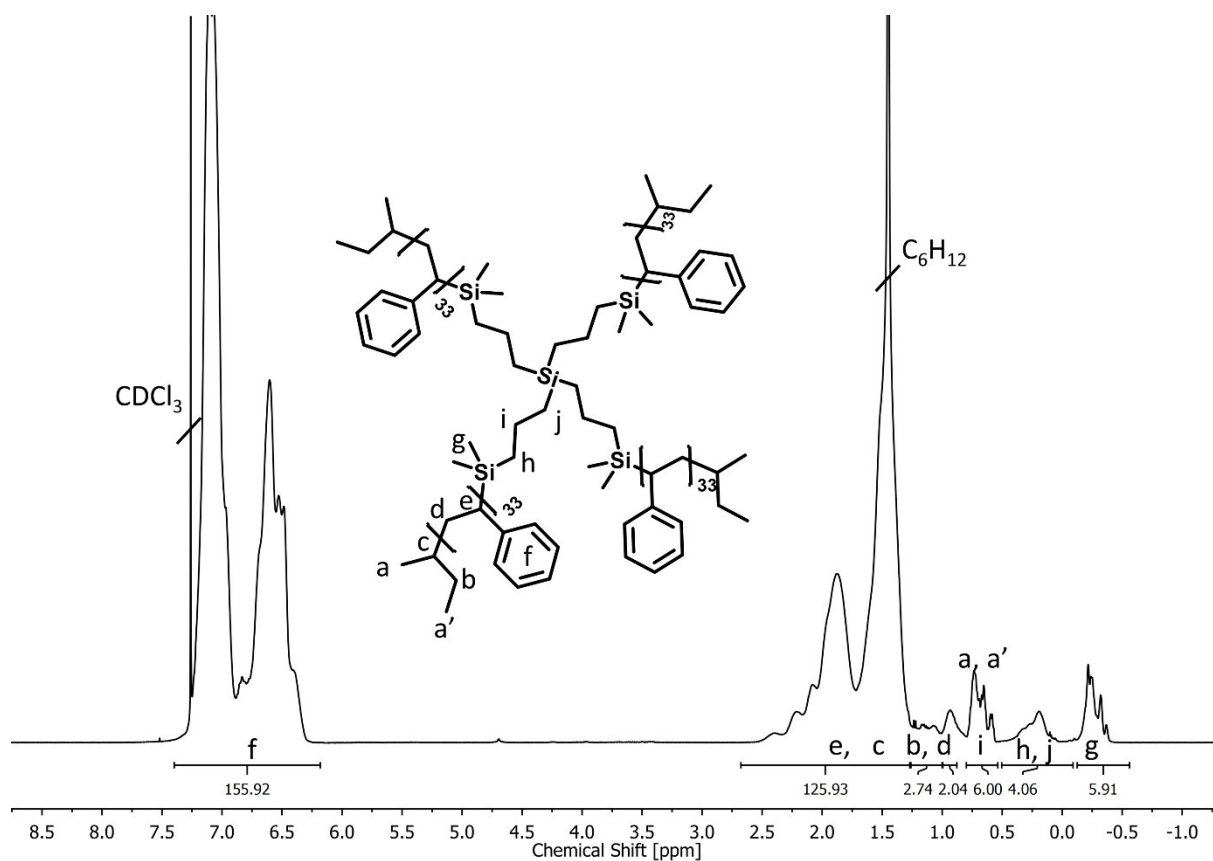

**Figure S7.**  $^1\text{H}$  NMR spectrum of PS 4-arm star polymer targeted  $12 \text{ kg mol}^{-1}$  (400 MHz,  $\text{CDCl}_3$ ).

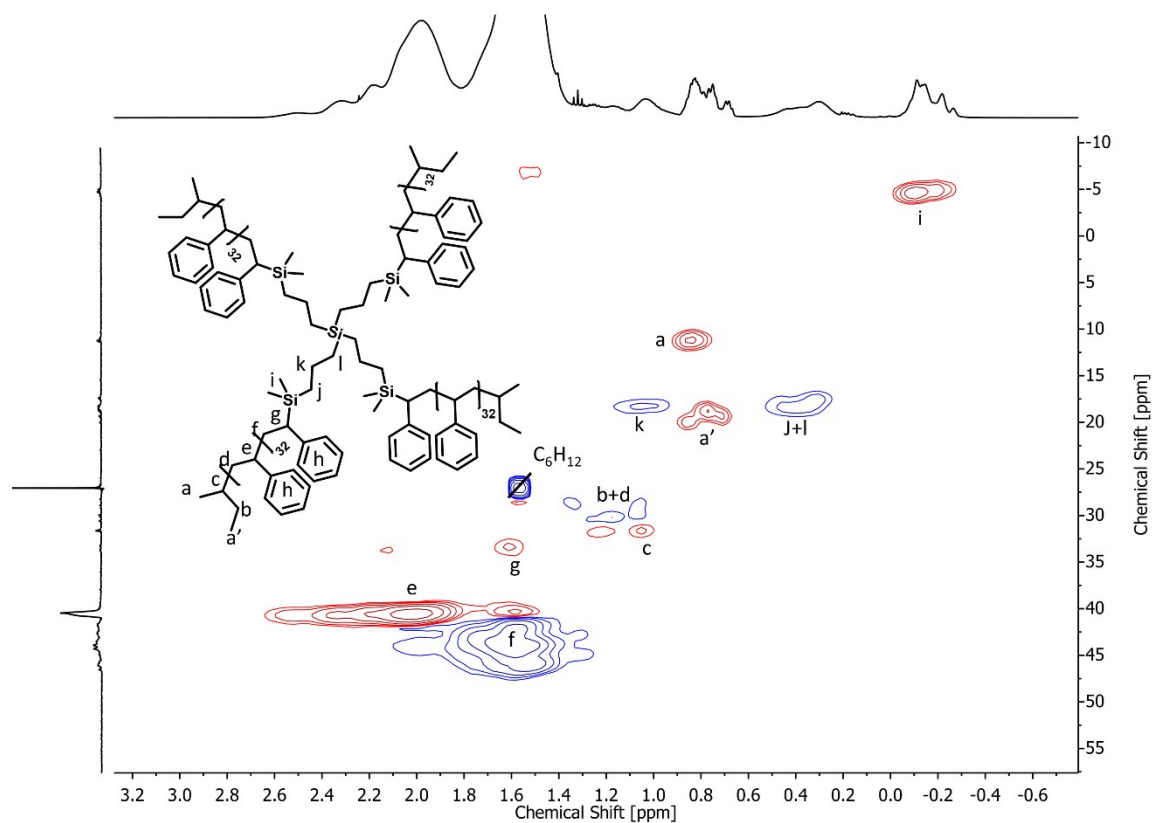

**Figure S8:** HSQC spectrum of polystyrene 4-arm star (relevant area) 400 MHz,  $CDCl_3$ ).

**Table S1** Synthesis results of PS linear and 4-arm star polymers coupled with TCDMSPS

| Sample | $M_w^{targeted}$<br>/ kg mol <sup>-1</sup> | $M_w^a$<br>/ kg mol <sup>-1</sup> | $f^b$          | $D^c$ |
|--------|--------------------------------------------|-----------------------------------|----------------|-------|
| 1      | 3                                          | $3.7 \pm 0.3$                     | -              | 1.04  |
| 2      | 12                                         | $12.4 \pm 0.2$                    | $3.30 \pm 0.1$ | 1.15  |

<sup>a</sup> Determined by SEC (averaged triple inject) viscometry in THF (UV signal) and UC, <sup>b</sup> star functionality calculated by  $f = M_{w,star} / M_{w,arm}$ , <sup>c</sup> determined by SEC in THF (UV signal).

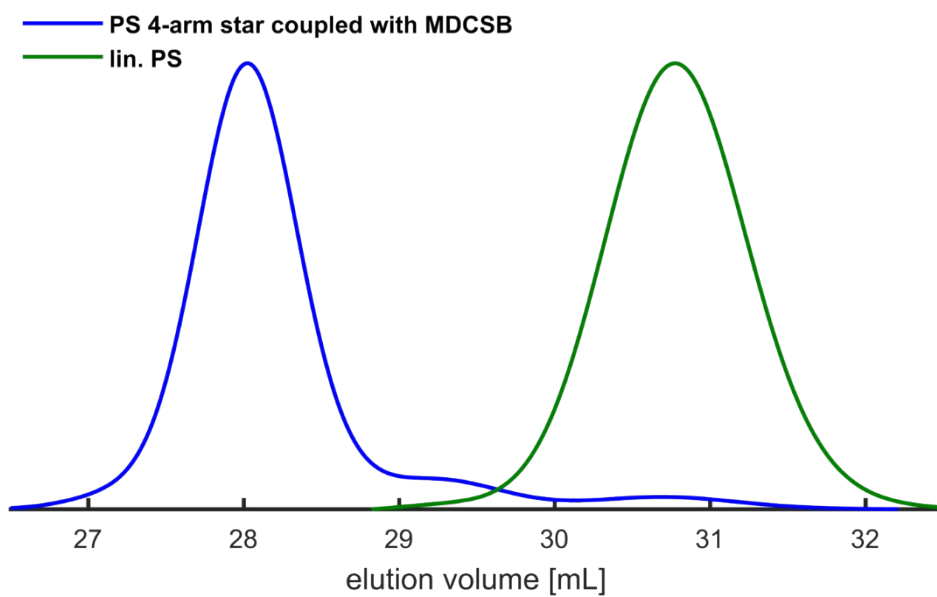

**Figure S9:** SEC traces (THF, UV signal); blue line PS 4-arm star targeted  $12 \text{ kg mol}^{-1}$  coupled with MDCSB, green line PS precursor, targeted  $3 \text{ kg mol}^{-1}$

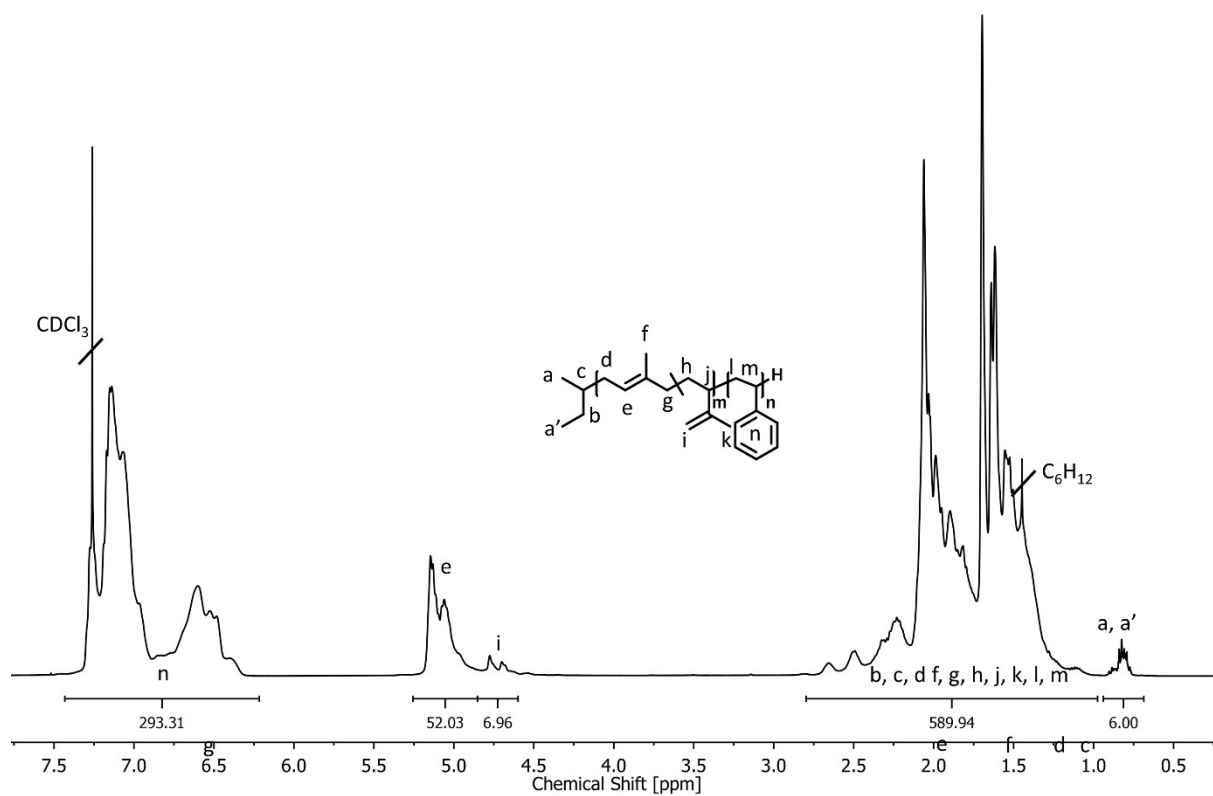

**Figure S10:**  $^1\text{H}$  NMR spectrum of  $\text{P}(\text{I}_{0.5}\text{-grad-S}_{0.5})$  star precursor (400 MHz,  $\text{CDCl}_3$ ).

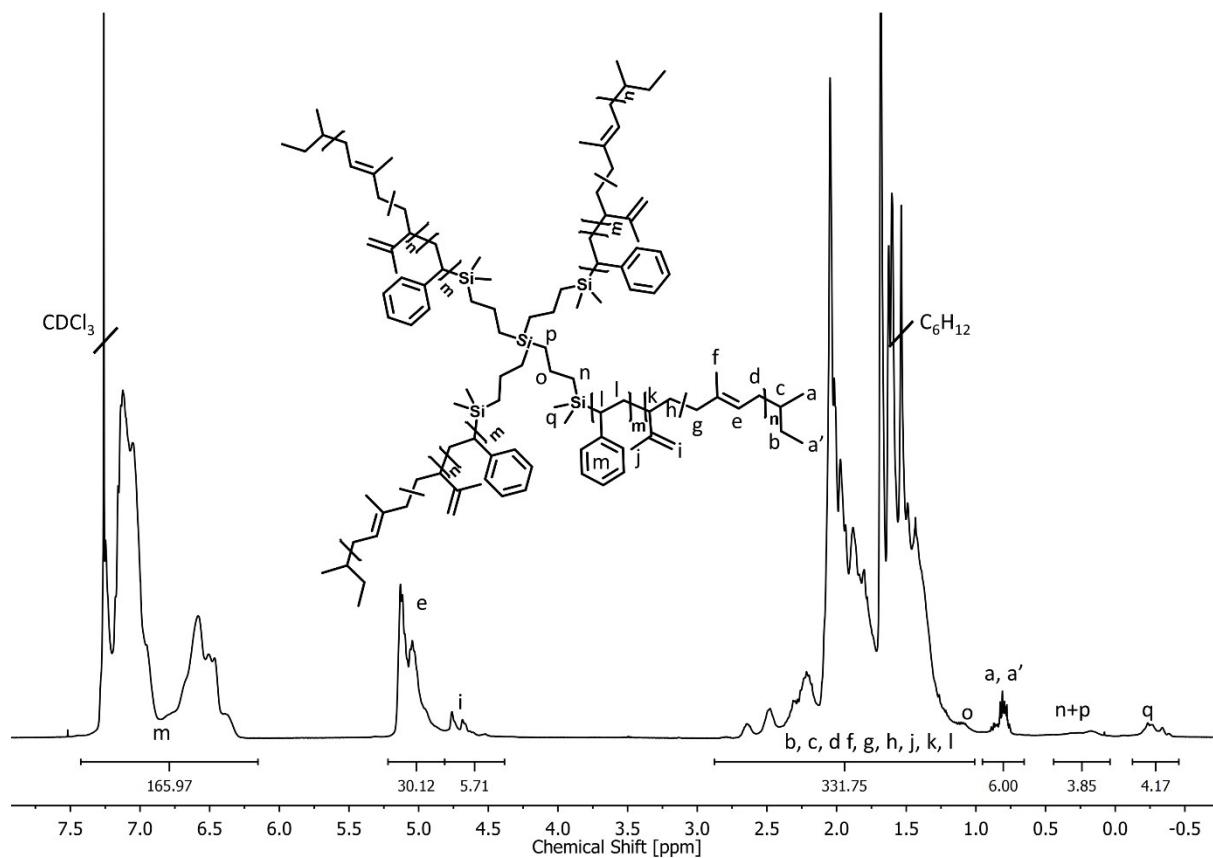

**Figure S11:**  $^1\text{H}$  NMR spectrum of  $\text{P}(\text{I}_{0.5}\text{-grad-S}_{0.5})$  4-arm star tapered copolymer (400 MHz,  $\text{CDCl}_3$ ).

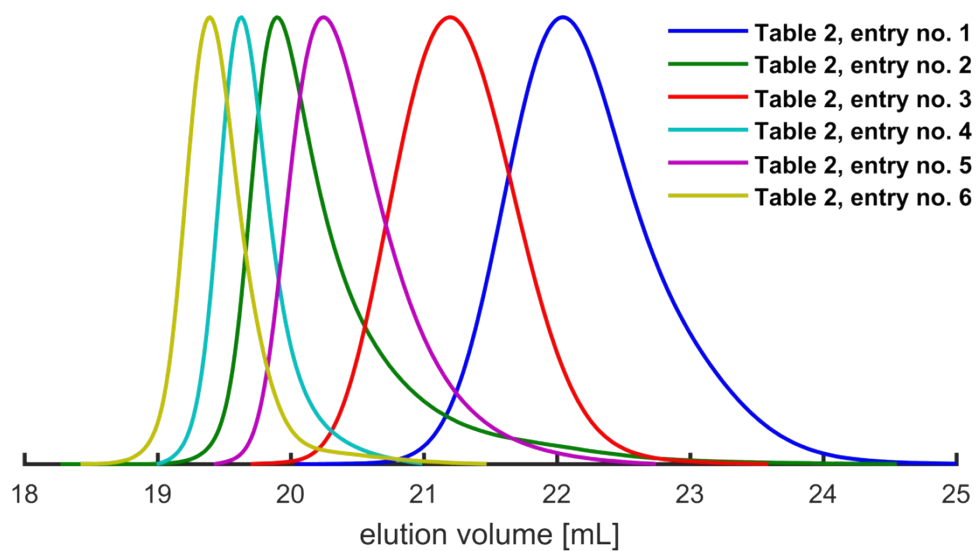

**Figure S12.** Elution traces from SEC (THF, UV signals) of  $\text{P}(\text{I}_{0.5}\text{-grad-S}_{0.5})$  4 arm star tapered copolymers targeted 40 - 120  $\text{kg mol}^{-1}$  (left) and  $\text{P}(\text{I}_{0.5}\text{-grad-S}_{0.5})$  linear precursors targeted 10 - 30  $\text{kg mol}^{-1}$  (right).

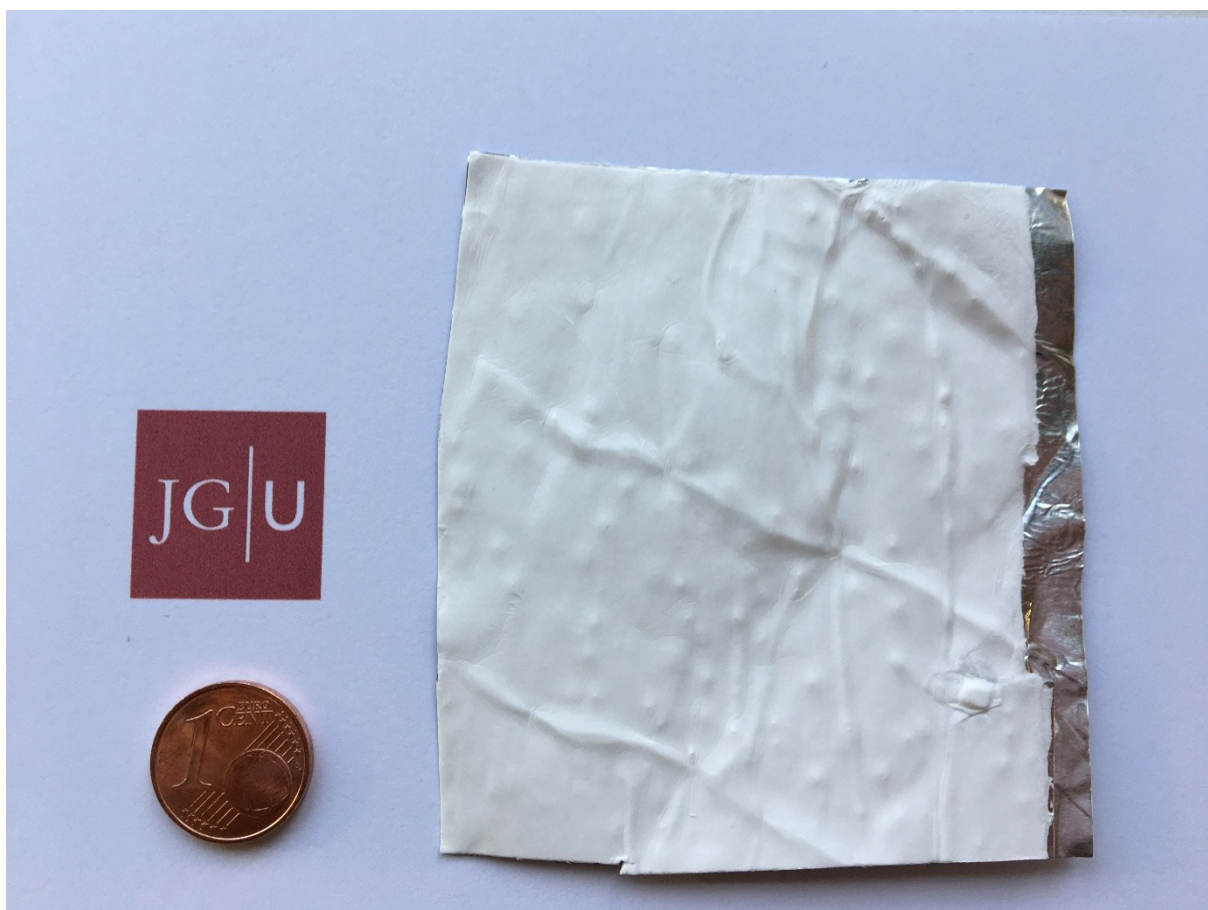

**Figure S13.** Electrospun P(I<sub>0.5-grad</sub>-S<sub>0.5</sub>) 4 arm star tapered copolymer nanofibers, sample 6,  $M_w = 118.8 \pm 2.0 \text{ kg mol}^{-1}$ )
